# Supplementary material for: Photosynthetic Diffusional Constraints Affect Yield in Drought Stressed Rice Cultivars during Flowering
Source: PubMed Central journal article supplement (PMC4183539; doi:10.1371/journal.pone.0109054), 2014-10-02

S1: dark respiration ( $R_d$ ) values of seven *Oryza sativa* varieties under irrigated (white) and rain-fed (grey) conditions used in the calculation of  $g_m$  using the variable J method.

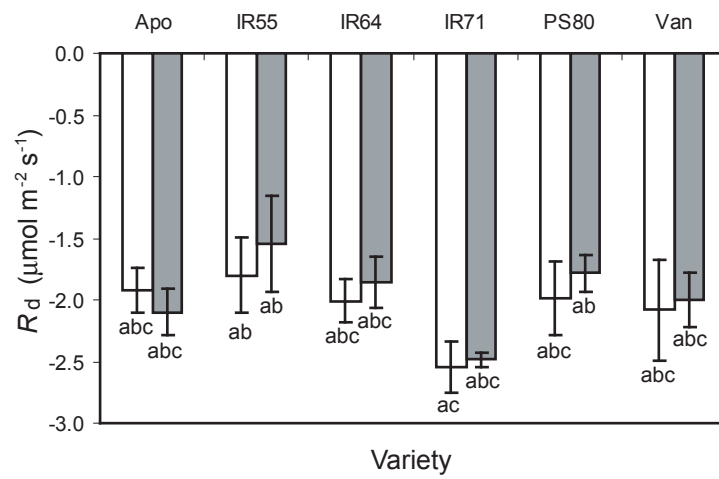

Supplement: pone.0109054.s001.pdf [file pone.0109054.s001.pdf]
